# Supplementary material for: Harnessing Bacillus inaquosorum AGSP2 for Enhancing ω-Transaminase Production Through Classical and AI-Supported Statistical Design
Source: Research Square preprint supplement (doi:10.21203/rs.3.rs-7609083/v1), 2025-10-09
Supplement: Supplementary file 1 [file 522625784972cb1277b7b721.docx]

**Harnessing *Bacillus inaquosorum* AGSP2 for Enhancing ω-Transaminase Production Through Classical and AI-Supported Statistical Design**

Shreya Pandya1, Urvish Chhaya1*, Akshaya Gupte2

*1Department of Microbiology, Natubhai V. Patel College of Pure and Applied Sciences*

*The Charutar Vidya Mandal (CVM) University Vallabh Vidyanagar-388120, Gujarat, India.*

*2 Post Graduate Department of Biosciences, Sardar Patel University, Vadtal Bakrol Road, Satellite Campus, Bakrool, 388315*

**
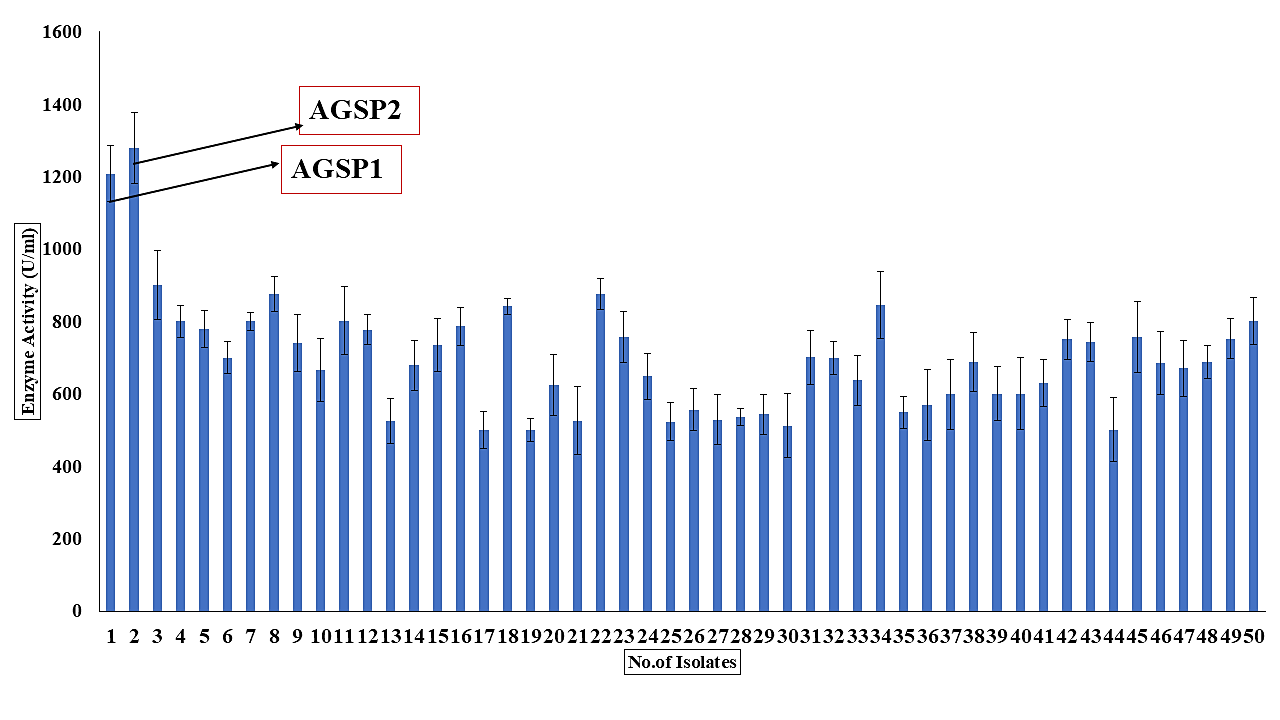
**

**Figure S1 Screening of Transaminase producing bacteria**

**Figure S2:** **Time course study**


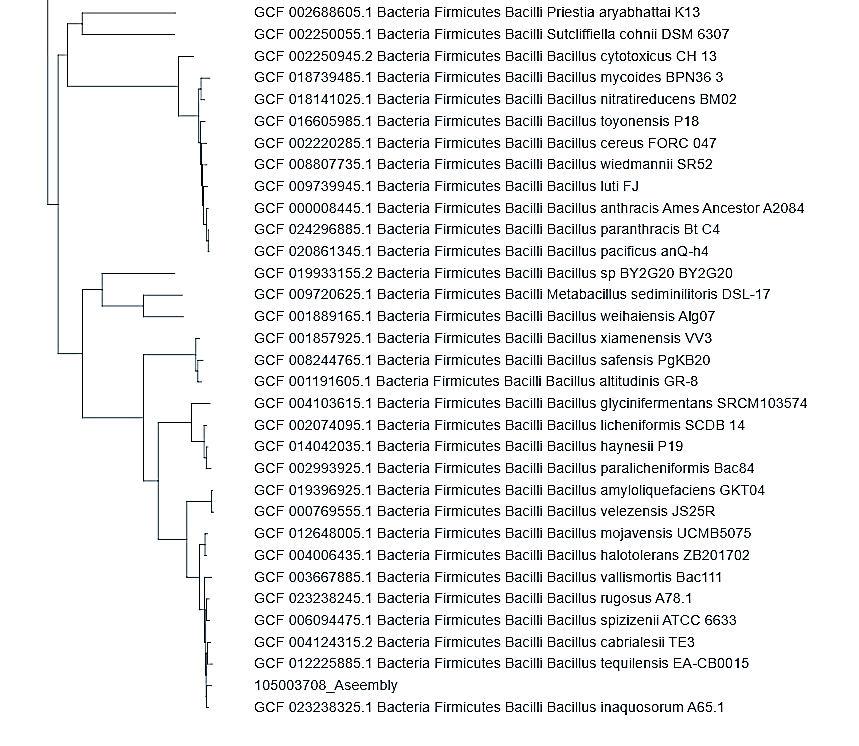


**Figure S3: Phylogenetic tree constructed for AGSP2 (*Bacillus inaquosorum*)**

**Figure S4** **Comparison of ω-transaminase production in unoptimized and optimized media**

**
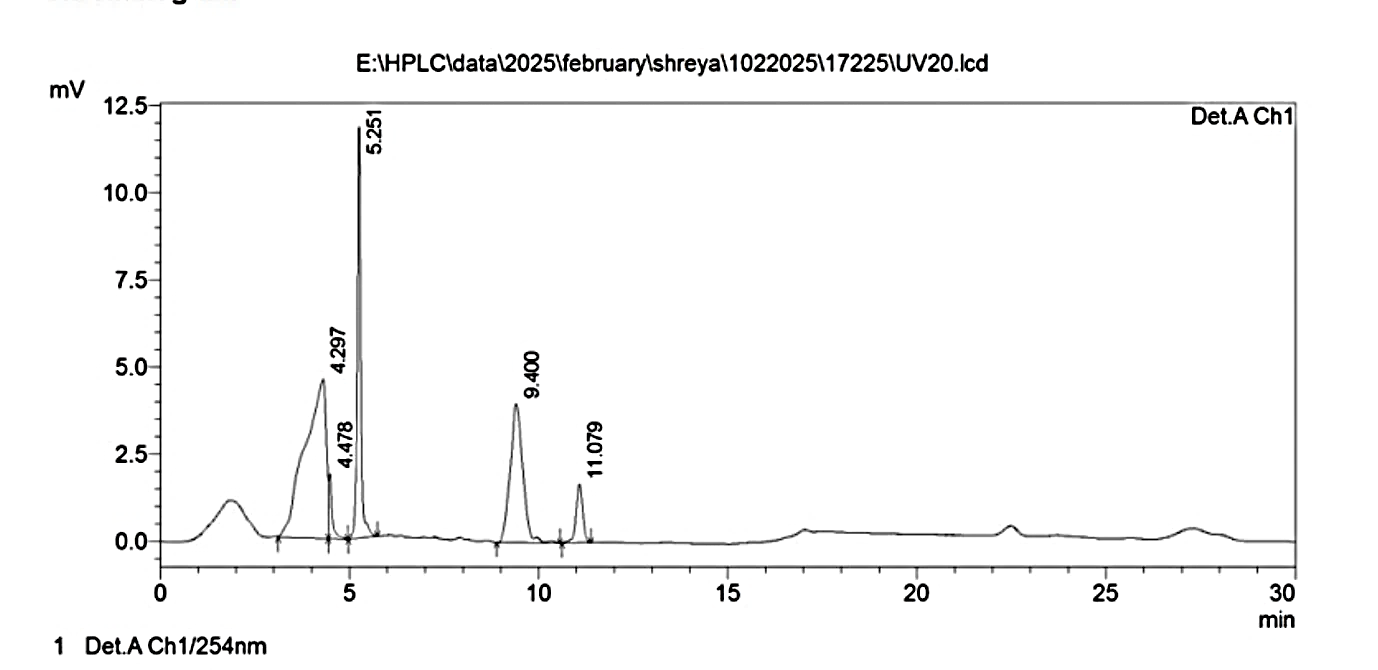
**

**Figure S5 Chromatogram of acetophenone**

**Table S1- Morphological and biochemical characteristics of AGSP2**

| Sr.No. | Tests | Results |
| --- | --- | --- |
| 1 | Gram’s Nature | Gram-positive |
| 2  3 | Shape  Colony morphology | Bacilli rod shape  White, irregular margin, opaque, raised, mucoid, and rough texture |
| 4 | Endospore test | Positive |
| 5 | Citrate test | Negative |
| 7 | Urease test | Negative |
| 8 | TSI test | Acidic slant and butt (Yellow color) |
| 9 | Hemolytic activity | Positive |
| 10 | Aerobic/Anaerobic | Aerobic |

**Table S2- Biochemical Tests of AGSP2**

| D-Amygdalin | - | Beta Galacto Pyranosidase Resorufine | - | Alanine Arylamidase | - | N-Acetyl-D-Glucosamine | - |
| --- | --- | --- | --- | --- | --- | --- | --- |
| Phosphatidylinositol  Phospholipase C | **-** | Alpha-Mannosidase | **-** | Tyrrosine Arylamidase | **-** | D-Maltose | **-** |
| D-Xylose | **-** | Phosphatase | **-** | D-Sorbitol | **+** | Bacitracin Resistance | **+** |
| Arginine Dihydrolase | **-** | Leusine Arylamidase | **-** | Urease | **-** | Novobiocin Resistance | **-** |
| Beta Galasidase | **-** | L-Proline Arylamidase | **-** | Polymixin B Resistance | **-** | Growth in 6.5% NaCl | **-** |
| Alpha Glucosidase | **-** | Beta Glucuronidase | **-** | D-Galactose | **-** | D-Mannitol | **+** |
| Ala-Phe-Pro Arylamidase | **-** | Alpha Galactosidase | **-** | D-Ribose | **-** | D-Mannose | **+** |
| Cyclo-Dextrin | **-** | L-Pyrolydonyl Arylamidase | **-** | L-Lactate alkalinisation | **-** | Methyl-B-D-Glucopyranosidase | **+** |
| L- Aspartate Arylamidase | **-** | Beta Glucuronidase | **-** | Lactose | **-** | Pullulane | **-** |
| D-Raffinose | **-** | Salicin | **+** | D-Trehalose | **+** | Optochin Resistance | **+** |
| O/129 Resistance (comp.vibrio) | **-** | Saccharose/Sucrose | **+** | Arginine Dihydrolase 2 | **-** |  |  |

[(**-**) negative and (+) positive]

**Table S3 RSM-CCD design model with AI validation**

| Std | Run | (A)yeast extract  (g/L) | (B)NaCl  (g/L) | (C)fructose  (g/L) | (D)peptone  (g/L) | Transaminase Activity  (U/ml) | RSM  Predicted value | SVM Predicted |
| --- | --- | --- | --- | --- | --- | --- | --- | --- |
| 4 | 1 | 10 | 10 | 8 | 8 | 3325.78 | 3606.09 | 3699.2 |
| 11 | 2 | 5 | 10 | 8 | 16 | 3411.28 | 3549.33 | 3118.238 |
| 15 | 3 | 5 | 10 | 16 | 16 | 2568.45 | 2891.51 | 3156.857 |
| 16 | 4 | 10 | 10 | 16 | 16 | 3521.45 | 3564.35 | 3479.87 |
| 26 | 5 | 7.5 | 7.5 | 12 | 12 | 6012.41 | 5820.73 | 5533.166 |
| 17 | 6 | 2.5 | 7.5 | 12 | 12 | 1511.56 | 1207.41 | 3161.727 |
| 9 | 7 | 5 | 5 | 8 | 16 | 3678.45 | 3807.72 | 3092.072 |
| 14 | 8 | 10 | 5 | 16 | 16 | 3554.12 | 3651.19 | 3453.704 |
| 18 | 9 | 12.5 | 7.5 | 12 | 12 | 2202.57 | 2087.95 | 3161.727 |
| 7 | 10 | 5 | 10 | 16 | 8 | 3514.78 | 3656.42 | 3414.806 |
| 2 | 11 | 10 | 5 | 8 | 8 | 3688.35 | 3322.99 | 3673.034 |
| 19 | 12 | 7.5 | 2.5 | 12 | 12 | 4395.14 | 4135.6 | 4846.036 |
| 28 | 13 | 7.5 | 7.5 | 12 | 12 | 6121.88 | 5820.73 | 5533.166 |
| 13 | 14 | 5 | 5 | 16 | 16 | 2858.78 | 3039.54 | 3130.69 |
| 8 | 15 | 10 | 10 | 16 | 8 | 4699.71 | 4528.15 | 3737.819 |
| 20 | 16 | 7.5 | 12.5 | 12 | 12 | 4429.91 | 4270.68 | 4530.344 |
| 5 | 17 | 5 | 5 | 16 | 8 | 3488.63 | 3324.13 | 3388.639 |
| 6 | 18 | 10 | 5 | 16 | 8 | 3811.66 | 4134.68 | 3711.652 |
| 3 | 19 | 5 | 10 | 8 | 8 | 3476.57 | 3337.2 | 3376.187 |
| 22 | 20 | 7.5 | 7.5 | 20 | 12 | 4460.12 | 4283.31 | 4560.554 |
| 29 | 21 | 7.5 | 7.5 | 12 | 12 | 5714.25 | 5820.73 | 5533.166 |
| 10 | 22 | 10 | 5 | 8 | 16 | 3497.12 | 3816.54 | 3415.085 |
| 21 | 23 | 7.5 | 7.5 | 4 | 12 | 4371.4 | 4129.44 | 4861.141 |
| 27 | 24 | 7.5 | 7.5 | 12 | 12 | 5721.44 | 5820.73 | 5533.166 |
| 24 | 25 | 7.5 | 7.5 | 12 | 20 | 4515.23 | 4048.25 | 4615.107 |
| 25 | 26 | 7.5 | 7.5 | 12 | 12 | 5721.24 | 5820.73 | 5533.166 |
| 12 | 27 | 10 | 10 | 8 | 16 | 3497.12 | 3619.33 | 3441.252 |
| 23 | 28 | 7.5 | 7.5 | 12 | 4 | 4271.4 | 4319.61 | 4888.417 |
| 1 | 29 | 5 | 5 | 8 | 8 | 2697.12 | 3115.29 | 3350.02 |
| 30 | 30 | 7.5 | 7.5 | 12 | 12 | 5633.14 | 5820.73 | 5533.166 |
